# Supplementary material
Source: MDPI journal article supplement (https://www.mdpi.com/2076-3905/5/3/22)
Supplement: s1 [file s1]

# Supplementary Materials: Serology in the Digital Age: Using Long Synthetic Peptides Created from Nucleic Acid Sequences as Antigens in Microarrays

Muhammad Rizwan, Bengt Rönnberg, Maxims Cistjakovs, Åke Lundkvist, Rudiger Pipkorn and Jonas Blomberg

**Table S1.** Sequences of the megapeptides used in this paper. GenBank identity numbers of the viral proteins, and the position inside the sequence are included for all of them. The megapeptide code name shown in Figures 3 and 4 is shown in parenthesis.

| GenBank Identity Number              | Position and Name                                         | Sequences                                                                                                                       |
|--------------------------------------|-----------------------------------------------------------|---------------------------------------------------------------------------------------------------------------------------------|
| Zaire_Ebola_AHX24667_GP1_3<br>85-501 | membrane proximal<br>portion of the<br>extracellular part | DNSTHNTVPYKLDISEATQVGQHRRADND<br>STASDTPPATTAAAGPLKAENTNTSKSADSLD<br>LATTSPQNYSETAGNNNTHHQDTGEESASS<br>GKLGLITNTIAGVAGLITGRRTRR |
| HHV7_YP_073779_gB_161-260            | hhv7gb161                                                 | NFKSDTVRRYITTKPEFLRNGPLWFYSTSTIN<br>CIVTDCIAKTKYPDFDFFALSTGETVEGSPFYNG<br>INSKTFNEPTEKILFRNNYTMLKTFDDGSKGN<br>FV                |
| HHV7_YP_073779_gB_241-340            | hhv7gb241                                                 | FRNNYTMLKTFDDGSKGNFVTLTKMAFLEK<br>GNTIFSWEVQNEESSICLLKHWMTIPHALRA<br>ENANSFHFIQELTASFVTGKSNYTLSDSKYN<br>CINSNYT                 |
| HHV7_YP_073779_gB_321-420            | hhv7gb321                                                 | GKSNYTLSDSKYNCINSNYTSILDEIYQTQYN<br>NSHDKNGSYEIFKTEGDLILWQPLIQRKLT<br>LENFSNASRKRKRRELETNKDIVVQLQYLY<br>DTLKD                   |
| HHV7_YP_073779_gB_401-500            | hhv7gb401                                                 | ETNKDIVVQLQYLYDTLKDYINTALGKLAE<br>AWCLNQKRTITVLHELKISPSGIISAVYGKP<br>MSAKLIGDVLAVSKCIEVNQTSVQLHKSMRL<br>TKDSSY                  |
| HHV7_YP_073779_gB_481-580            | hhv7gb481                                                 | VNQTSVQLHKSMRLTKDSSYDALRCYSRPLL<br>TYSFANSSKETYLGQLGLDNEILLGNHRTTEC<br>EQSNTKIFLSGKFAHIFKDYTYVNSSLITEIEAL<br>DAF                |
| HHV7_YP_073779_gB_561-660            | hhv7gb561                                                 | KDYTYVNSSLITEIEALDAFVDLNIIDPLENAD<br>FTLLELYTKDELSKANVFDLETILREYNSYKSA<br>LHHIETKIATVTPTYIGGIDTFFKGLGALGLGL<br>GA               |
| HHV7_YP_073779_gB_641-740            | hhv7gb641                                                 | IGGIDTFFKGLGALGLGLGAVLGVTAGALGD<br>VVNGVFSFLKNPFGGALTILLTGVLGLVIFLF<br>LRHKRLAQTPIDILFPYTSKSTNSVLQATQSV<br>QAQV                 |
| HHV7_YP_073779_gB_721-823            | hhv7gb721                                                 | YTSKSTNSVLQATQSVQAQVKEPLDSSPPYLK<br>TNKDTEPQGDDITHTNEYSQVEALKMLKAIK<br>LLDESYKKAIEAEAKKSQRPSLLERIYRGYQ<br>KLSTEEL               |

Table S1. Cont.

| GenBank Identity Number | Position and Name | Sequences                                                                                                                         |
|-------------------------|-------------------|-----------------------------------------------------------------------------------------------------------------------------------|
| JCV_VP1_1489518_1-102   | jcvvp1_1          | MAPTKRKGERKDPVQVPKLLIRGGVEVLEVK<br>TGVDSITEVECFLTPMGDPDEHLRGFSKSISI<br>SDTFESDSPNRDMLPCYSVARIPLPNLNEDLT<br>CGNILM                 |
| JCV_VP1_1489518_47-148  | jcvvp1_47         | EMGDPDEHLRGFSKSISISDTFESDSPNRDML<br>PCYSVARIPLPNLNEDLTGCGNILMWEAVTLK<br>TEVIGVTSLMNVHSNGQATHDNGAGKPVQ<br>GTSFHFFSVG               |
| JCV_VP1_1489518_103-218 | jcvvp1_103        | WEAVTLKTEVIGVTSLMNVHSNGQATHDN<br>GAGKPVQGTSGFHFFSVGGAELELQGVLFNYR<br>TKYPDGTIFPKNATVQSQVMNTEHKAYLDK<br>NKAYPVECWVPDPTRNENTRYFGTLT |
| JCV_VP1_1489518_149-262 | jcvvp1_149        | GEALELQGVLFNYRTKYPDGTIFPKNATVQS<br>QVMNTEHKAYLDKNKAYPVECWVPDPTRN<br>ENTRYFGTLTGGENVPPVLHITNTATTVLLDE<br>FGVGPLCKGDONLYLSAVDVCGM   |
| JCV_VP1_1489518_219-334 | jcvvp1_219        | GGENVPPVLHITNTATTVLLDEFGVGPLCKG<br>DNLYLSAVDVCGMFTNRSGSQWRGLSRYF<br>KVQLRKRRVKNPYPIFLLTDLINRRTPRVDG<br>QPMYGMDAQVEEV RVFEGTEELP   |
| JCV_VP1_1489518_252-354 | jcvvp1_252        | LYLSAVDVCGMFTNRSGSQWRGLSRYFKV<br>QLRKRRVKNPYPIFLLTDLINRRTPRVDGQP<br>MYGMDAQVEEV RVFEGTEELPGDPDMMRY<br>VDKYGQLQTKML                |
